# Supplementary material for: Safety and Outcomes of Mechanical Thrombectomy in Acute Ischemic Stroke Attributable to Cardiological Diseases: A Scoping Review
Source: PubMed Central journal article supplement — J Am Heart Assoc. 2024 Jun 11;13(17):e034783. doi: 10.1161/JAHA.124.034783 (PMC11646491; doi:10.1161/jaha.124.034783), 2024-06-11
Supplement: JAH3-13-e034783-s001.pdf [file JAH3-13-e034783-s001.pdf]

# **SUPPLEMENTAL MATERIAL**

## Supplemental Methods

### Data S1. Search string.

((mechanical thrombectomy ischemic stroke [Title/Abstract]) OR (endovascular thrombectomy ischemic stroke [Title/Abstract])) OR (large vessel occlusion [Title/Abstract]) AND ((ischemic heart disease [Title/Abstract]) OR (Percutaneous Coronary Intervention [Title/Abstract]) OR (heart failure [Title/Abstract]) OR (endocarditis [Title/Abstract]) OR (infective endocarditis [Title/Abstract]) OR (cardiac tumors [Title/Abstract]) OR (atrial myxoma [Title/Abstract]) OR(TAVI[Title/Abstract]) OR (Transcatheter Aortic Valve Implantation [Title/Abstract]) OR (atrial fibrillation[Title/Abstract]) OR (atrial flutter [Title/Abstract]) OR (cardiac arrest[Title/Abstract]) OR (aortic dissection[Title/Abstract]) OR (aortic aneurysm[Title/Abstract]) OR (congenital heart disease [Title/Abstract]) OR (heart valve disease[Title/Abstract]) OR (heart arrhythmia [Title/Abstract]) OR (cardiac surgery [Title/Abstract]))).

**Table S1. Left ventricular assist device and total artificial heart and mechanical thrombectomy.**

| Reference                              | Study type          | Total number of patients* | Age (yo)                 | Number of patients treated with MT (%) | Patients with mRS 0-2 at 90 days (%) | Patients with mRs of 6 at 90 days (%) | Patients with sICH (%) | Patients with successful recanalisation (mTICI 2b-3) (%) | Summary of study findings                                          |
|----------------------------------------|---------------------|---------------------------|--------------------------|----------------------------------------|--------------------------------------|---------------------------------------|------------------------|----------------------------------------------------------|--------------------------------------------------------------------|
| Al-Mufti et al. 2016 <sup>124</sup>    | Case series         | 5                         | mean 61 (range: 21-65)   | 5 (100.0%)                             | 2 (40.0%)                            | 2 (40.0%)                             | NA                     | 2 (40.0%)                                                | MT may be safe and improve clinical outcomes in patients with LVAD |
| Kawamura et al. 2022 <sup>125</sup>    | Case series         | 9                         | mean 52 (range: 27-60)   | 9 (100.0%)                             | 6 (66.7%)                            | 1 (11.1%)                             | 0 (0.0%)               | 8 (88.9%)                                                | MT may be safe and effective in patients with LVAD                 |
| Le Picault et al. 2021 <sup>126</sup>  | Case report         | 2                         | 44 and 35                | 2 (100.0%)                             | 2 (100.0%)                           | 0 (0.0%)                              | 0 (0.0%)               | 2 (100.0%)                                               | MT may be safe and effective in patients with LVAD                 |
| Rice et al. 2018 <sup>127</sup>        | Observational study | 16                        | mean 56.7 (range: 27-76) | 5 (31.0%)                              | NA                                   | 2 (40.0%)                             | NA                     | 5 (100.0%)                                               | MT may be safe and effective in patients with LVAD                 |
| Rettenmaier et al. 2020 <sup>128</sup> | Observational study | 19                        | mean 55.8                | 8 (42.1%)                              | NA                                   | NA                                    | 4/19 (21.1%)           | 8 (100.0%)                                               | MT may be safe and                                                 |

|                                                |                                                                 |                                                         |                                               |                                    |                 |                                                                    |                                                             |            |                                                                             |
|------------------------------------------------|-----------------------------------------------------------------|---------------------------------------------------------|-----------------------------------------------|------------------------------------|-----------------|--------------------------------------------------------------------|-------------------------------------------------------------|------------|-----------------------------------------------------------------------------|
|                                                |                                                                 |                                                         | (±sd:<br>12.0)                                |                                    |                 |                                                                    | (not<br>specifically<br>assessed in<br>patients<br>with MT) |            | effective in<br>patients with<br>LVAD                                       |
| Ryu et al.<br>2018 <sup>129</sup>              | Literature<br>review and<br>case series                         | 13                                                      | mean<br>43.8<br>(range:<br>8-69)              | 13<br>(100%)                       | 6/11<br>(54.5%) | 1/11 (9.1%)                                                        | NA                                                          | 4/4 (100%) | MT may be<br>safe and<br>effective in<br>patients with<br>LVAD              |
| Whitaker-<br>Lea et al.<br>2020 <sup>130</sup> | Retrospective<br>observational<br>single-center<br>cohort study | 31                                                      | NA                                            | 4 (12.9%)                          | NA              | NA                                                                 | NA                                                          | NA         | Neurologic<br>complications<br>are frequent<br>after LVAD<br>implantation   |
| Hak et al.<br>2021 <sup>131</sup>              | Case report                                                     | 1                                                       | 14                                            | 1 (100%)                           | 1 (100%)        | 0 (0%)                                                             | 0 (0%)                                                      | 1 (100%)   | MT may be<br>safe and<br>effective in<br>pediatric<br>patients with<br>LVAD |
| Suzuki et al.<br>2021 <sup>132</sup>           | Case series                                                     | 12                                                      | NA                                            | 4 (33.3%)                          | NA              | 1 (25%)                                                            | 1 (25%)                                                     | 4 (100%)   | MT may be<br>safe and<br>effective in<br>patients with<br>LVAD              |
| Ibeh et al.<br>2023 <sup>133</sup>             | Retrospective<br>observational<br>multicenter<br>cohort study   | 1,633,234<br>AIS<br>patients of<br>which 794<br>(0.05%) | no<br>LVAD:<br>mean<br>70.4<br>(±sd:<br>15.1) | no LVAD:<br>1%<br><br>LVAD:<br>4%* | NA              | (only intra-<br>hospital<br>mortality data<br>available as<br>aOR) | NA                                                          | NA         | higher<br>mortality<br>rates after<br>MT in AIS<br>patients with<br>post-   |

|  |  |           |                              |  |  |                                                                                                                               |  |  |                                                                           |
|--|--|-----------|------------------------------|--|--|-------------------------------------------------------------------------------------------------------------------------------|--|--|---------------------------------------------------------------------------|
|  |  | with LVAD | LVAD: mean 57.7 (±sd: 15.3)* |  |  | pre-existing LVAD vs. no LVAD: aOR=1.06 (95%CI=0.29-3.91)<br><br>post-operative LVAD vs. no LVAD: aOR=8.66 (95%CI=1.46-51.3)* |  |  | operative LVAD, but not with pre-existing LVAD, vs. patients without LVAD |
|--|--|-----------|------------------------------|--|--|-------------------------------------------------------------------------------------------------------------------------------|--|--|---------------------------------------------------------------------------|

aOR: adjusted odds ratio; LVAD: left-ventricular assist device; MT: mechanical thrombectomy; sd: standard deviation; mRS: modified Rankin Scale; sICH: symptomatic intracranial haemorrhage; mTICI: modified Treatment in Cerebral Ischemia score.

\*otherwise differently specified, it indicates the n. of patients with acute ischemic stroke and LVAD.

**Table S2. Congenital heart disease and mechanical thrombectomy.**

| Reference                         | Study type  | Total number of patients | Age (yo) | Number of patients treated with MT (%) | Patients with mRS 0-2 at 90 days (%) | Patients with mRS of 6 at 90 days (%) | Patients with sICH (%) | Patients with successful recanalisation (mTICI 2b-3) (%) | Summary of study findings                                   |
|-----------------------------------|-------------|--------------------------|----------|----------------------------------------|--------------------------------------|---------------------------------------|------------------------|----------------------------------------------------------|-------------------------------------------------------------|
| Lu et al. 2020 <sup>136</sup>     | Case report | 1                        | 38       | 1 (100.0%)                             | 1 (100.0%)                           | 0 (0.0%)                              | 0 (0.0%)               | 1 (100.0%)                                               | MT may be safe and effective in adult patients with CHD     |
| Souto et al. 2019 <sup>137</sup>  | Case report | 1                        | 4        | 1 (100.0%)                             | 1 (100.0%)                           | 0 (0.0%)                              | 0 (0.0%)               | 1 (100.0%)                                               | MT may be safe and effective in pediatric patients with CHD |
| Gerstl et al. 2016 <sup>138</sup> | Case report | 1                        | 3        | 1 (100.0%)                             | 1 (100.0%)                           | 0 (0.0%)                              | 0 (0.0%)               | 1 (100.0%)                                               | MT may be safe and effective in pediatric patients with CHD |
| Nasr et al. 2021 <sup>139</sup>   | Case report | 1                        | 2        | 1 (100.0%)                             | 1 (100.0%)                           | 0 (0.0%)                              | 0 (0.0%)               | 1 (100.0%)                                               | MT may be safe and effective in pediatric patients with CHD |

MT: mechanical thrombectomy; mRS: modified Rankin Scale; sICH: symptomatic intracranial haemorrhage; mTICI: modified Treatment in Cerebral Ischemia score.

**Table S3. Cardiac tumours and mechanical thrombectomy.**

| <b>Reference</b>                         | <b>Study type</b> | <b>Total number of patients</b> | <b>Age (yo)</b> | <b>Number of patients treated with MT (%)</b> | <b>Patients with mRS 0-2 at 90 days (%)</b> | <b>Patients with mRs of 6 at 90 days (%)</b> | <b>Patients with sICH (%)</b> | <b>Patients with successful recanalisation (mTICI 2b-3) (%)</b> | <b>Summary of study findings</b>                                       |
|------------------------------------------|-------------------|---------------------------------|-----------------|-----------------------------------------------|---------------------------------------------|----------------------------------------------|-------------------------------|-----------------------------------------------------------------|------------------------------------------------------------------------|
| Bedoya et al. 2021 <sup>146</sup>        | Case report       | 1                               | 43              | 1 (100%)                                      | NA                                          | NA                                           | 0 (0%)                        | 1 (100%)                                                        | MT may be safe and improve clinical outcomes in AIS patients with CATs |
| Garcia-Ptacek et al. 2014 <sup>147</sup> | Case report       | 2                               | 34 and 45       | 2 (100%)                                      | 1 (50%)                                     | 0 (0%)                                       | 0 (0%)                        | 1 (50%)                                                         | MT may be safe and improve clinical outcomes in AIS patients with CATs |
| Santos et al. 2014 <sup>148</sup>        | Case report       | 1                               | 34              | 1 (100%)                                      | 0 (0%)                                      | 0 (0%)                                       | 0 (0%)                        | 0 (0%)                                                          | MT may be safe and improve clinical outcomes in AIS patients with CATs |

|                                             |                            |   |                             |           |          |        |          |          |                                                                        |
|---------------------------------------------|----------------------------|---|-----------------------------|-----------|----------|--------|----------|----------|------------------------------------------------------------------------|
| Stefanou et al. 2018 <sup>149</sup>         | Retrospective cohort study | 8 | mean 61.7<br>(±sd:<br>17.5) | 1 (12.5%) | 1 (100%) | 0 (0%) | 0 (0%)   | 1 (100%) | MT may be safe and improve clinical outcomes in AIS patients with CATs |
| Tadi et al. 2019 <sup>150</sup>             | Case report                | 1 | 23                          | 1 (100%)  | 1 (100%) | 0 (0%) | 0 (0%)   | 1 (100%) | MT may be safe and improve clinical outcomes in AIS patients with CATs |
| Tejada et al. 2014 <sup>151</sup>           | Case report                | 1 | 64                          | 1 (100%)  | 1 (100%) | 0 (0%) | 1 (100%) | 1 (100%) | MT may be safe and improve clinical outcomes in AIS patients with CATs |
| Van de Wijngaard et al. 2014 <sup>152</sup> | Case report                | 1 | 14                          | 1 (100%)  | 1 (100%) | 0 (0%) | 0 (0%)   | 1 (100%) | MT may be safe and improve clinical outcomes in AIS patients with CATs |



|                                    |             |   |    |          |          |        |        |        |                                                                        |
|------------------------------------|-------------|---|----|----------|----------|--------|--------|--------|------------------------------------------------------------------------|
| Vega et al.<br>2015 <sup>153</sup> | Case report | 1 | 11 | 1 (100%) | 1 (100%) | 0 (0%) | 0 (0%) | 0 (0%) | MT may be safe and improve clinical outcomes in AIS patients with CATs |
|------------------------------------|-------------|---|----|----------|----------|--------|--------|--------|------------------------------------------------------------------------|

AIS: acute ischemic stroke; CATs: cardiac tumors; MT: mechanical thrombectomy; mRS: modified Rankin Scale; sICH: symptomatic intracranial haemorrhage; mTICI: modified Treatment in Cerebral Ischemia score.

**Table S4. Cardiac surgery and mechanical thrombectomy.**

| Reference                          | Study type                 | Total number of patients         | Age (yo)                 | Number of patients treated with MT (%)  | Patients with mRS 0-2 at 90 days (%) | Patients with mRs of 6 at 90 days (%) | Patients with sICH (%) | Patients with successful recanalisation (mTICI 2b-3) (%)    | Summary of study findings                                                  |
|------------------------------------|----------------------------|----------------------------------|--------------------------|-----------------------------------------|--------------------------------------|---------------------------------------|------------------------|-------------------------------------------------------------|----------------------------------------------------------------------------|
| Moazami et al. 2001 <sup>165</sup> | Observational              | 13                               | 69 (±sd:5)               | 13 (100%)<br>Intraarterial thrombolysis | NA                                   | NA                                    | 0                      | TIMI grade 3<br>1 patient;<br>TIMI grade 2<br>in 6 patients | Intraarterial thrombolysis appears safe post cardiac surgery               |
| Joy et al. 2022 <sup>166</sup>     | Case report                | 1                                | 34                       | 1<br>Intraarterial thrombolysis         | 1                                    | 0                                     | 0                      | 1                                                           | Intraarterial thrombolysis appears safe and effective post cardiac surgery |
| Fukuda et al. 2003 <sup>167</sup>  | Case series                | 5                                | 57; 77;<br>58;64;71      | 5 (100%)<br>Intraarterial thrombolysis  | NA                                   | 0                                     | 0                      | 3 (60%)                                                     | Intraarterial thrombolysis appears safe and effective post cardiac surgery |
| Gupta et al. 2022 <sup>58</sup>    | Case series                | 5 patients with AIS following CS | mean 73.1 (range: 54-88) | 5 (100.0%)                              | 1 (20.0%)                            | 1 (20.0%)                             | 0 (0.0%)               | 2 (40.0%)                                                   | MT is safe and effective in patients with AIS following CS                 |
| Sheriff et al. 2019 <sup>156</sup> | Retrospective cohort study | 7 patients with AIS              | mean 58.7                | 7 (100.0)                               | 3 (42.9)                             | 1 (14.3)                              | 2 (28.6)               | 4 (57.1)                                                    | MT may be safe and                                                         |

|                                         |                            | following CS                                                   | (range: 37-70)                                                                                                    |             |                                                            |                                                            |                          |          | effective in patients with AIS following CS                  |
|-----------------------------------------|----------------------------|----------------------------------------------------------------|-------------------------------------------------------------------------------------------------------------------|-------------|------------------------------------------------------------|------------------------------------------------------------|--------------------------|----------|--------------------------------------------------------------|
| Wilkinson et al. 2021 <sup>159</sup>    | Retrospective cohort study | 163 patients with AIS following CS of which 15 (9.2%) with LVO | no LVO: mean 63.7 (±sd: 14)<br><br>LVO without MT: mean 68.0 (±sd: 7.4)<br><br>LVO with MT: mean 70.0 (±sd: 13.2) | 6/15 (40.0) | LVO without MT: 0/9 (0.0%)<br><br>LVO with MT: 4/6 (66.7%) | LVO without MT: 4/9 (44.4%)<br><br>LVO with MT: 0/6 (0.0%) | LVO with MT: 1/6 (16.7%) | NA       | MT improves the clinical outcomes of LVO AIS following CS    |
| Al-Khawaldeh et al. 2015 <sup>160</sup> | Case report                | 1                                                              | 52                                                                                                                | 1           | 1 (100%)                                                   | 0 (0%)                                                     | 0 (0%)                   | 1 (100%) | MT may improve the clinical outcomes of LVO AIS following CS |
| Madeira et al. 2016 <sup>76</sup>       | Case report                | 3                                                              | 72, 20 and 42                                                                                                     | 3 (100%)    | 3 (100%)                                                   | 0 (0%)                                                     | 0 (0%)                   | 3 (100%) | MT may improve the clinical                                  |

|                                       |                            |                                     |                        |          |          |        |        |          |                                                              |
|---------------------------------------|----------------------------|-------------------------------------|------------------------|----------|----------|--------|--------|----------|--------------------------------------------------------------|
|                                       |                            |                                     |                        |          |          |        |        |          | outcomes of LVO AIS following CS                             |
| Haider al et a. 2017 <sup>161</sup>   | Case report                | 2                                   | 52 and 75              | 2 (100%) | NA       | NA     | 0 (0%) | 2 (100%) | MT may improve the clinical outcomes of LVO AIS following CS |
| Fitzgerald et al. 2019 <sup>162</sup> | Case report                | 1                                   | 79                     | 1        | NA       | NA     | 0 (0%) | 1 (100%) | MT may improve the clinical outcomes of LVO AIS following CS |
| Thomas et al. 2017 <sup>163</sup>     | Case report                | 1                                   | 69                     | 1        | 1 (100%) | 0 (0%) | 0 (0%) | 1 (100%) | MT may improve the clinical outcomes of LVO AIS following CS |
| Laimoud et al. 2022 <sup>157</sup>    | Retrospective cohort study | 31 patients with AIS following CABG | mean 66 (range: 54-75) | 2 (6.5%) | NA       | NA     | NA     | NA       | higher mortality rates in patients with vs. without AIS      |

|  |  |  |  |  |  |  |  |  |                   |
|--|--|--|--|--|--|--|--|--|-------------------|
|  |  |  |  |  |  |  |  |  | following<br>CABG |
|--|--|--|--|--|--|--|--|--|-------------------|

CABG: coronary artery bypass grafting; MT: mechanical thrombectomy; modified Rankin Scale; sICH: symptomatic intracranial haemorrhage; mTICI: modified Treatment in Cerebral Ischemia score.
